# Supplementary material for: Pure thiophene–sulfur doped reduced graphene oxide: synthesis, structure, and electrical properties
Source: Royal Society of Chemistry journal article supplement (doi:10.1039/c3nr05061k), 2014-01-01
Supplement: c3nr05061k1.pdf [file c3nr05061k1.pdf]

# Supplementary Information

Pure thiophene-sulfur doped reduced graphene oxide: synthesis,  
structure, and electrical properties

Zegao Wang,<sup>a</sup> Pingjian Li,<sup>a\*</sup> Yuanfu Chen,<sup>a\*</sup> Jiarui He,<sup>a</sup> Wanli Zhang,<sup>a</sup> Oliver G.  
Schmidt<sup>b,c</sup> and Yanrong Li<sup>a</sup>

<sup>a</sup>State Key Laboratory of Electronic Thin Films and Integrated Devices, University of  
Electronic Science and Technology of China, Chengdu 610054, P. R. China

<sup>b</sup>Institute for Integrative Nanosciences, IFW Dresden, Helmholtzstrasse 20, 01069  
Dresden, Germany.

<sup>c</sup>Center for Advancing Electronics Dresden, TU Dresden, 01062 Dresden, Germany.

\*To whom correspondence should be addressed, [yfchen@uestc.edu.cn](mailto:yfchen@uestc.edu.cn),  
[lipingjian@uestc.edu.cn](mailto:lipingjian@uestc.edu.cn)

**TABLE S1.** The S content of S-doped rGO synthesized by different methods.

| Method            | Thiophene-S Content | Oxide-S Content                  | Ref               |
|-------------------|---------------------|----------------------------------|-------------------|
| Thermal Annealing | 0.96 wt%            | 0.56 wt%                         | [1]               |
|                   | 1.06 wt%            | 0.23 wt%                         |                   |
| Thermal Annealing | 1.2 at%             | 0.6 at%                          | [2]               |
|                   | 1.3 at%             | 0.4 at%                          |                   |
| Thermal Annealing | 1.0 at%             | 5.6 at%                          | [3]               |
| <b>This study</b> | <b>1.2 at%</b>      | <b>below the detection limit</b> | <b>This study</b> |

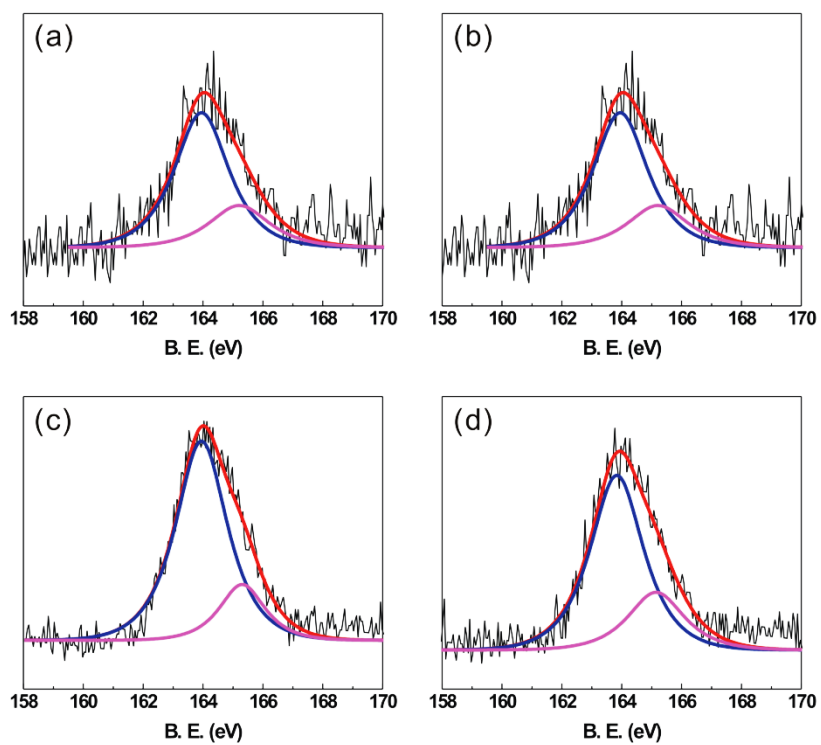

**Figure S1.** The high resolution S2p XPS spectra of S-doped rGO synthesized at (a) 2 h, (b) 5 h, (c)10 h and (d) 15 h; the ethanol-thermal reaction time is 180 °C.

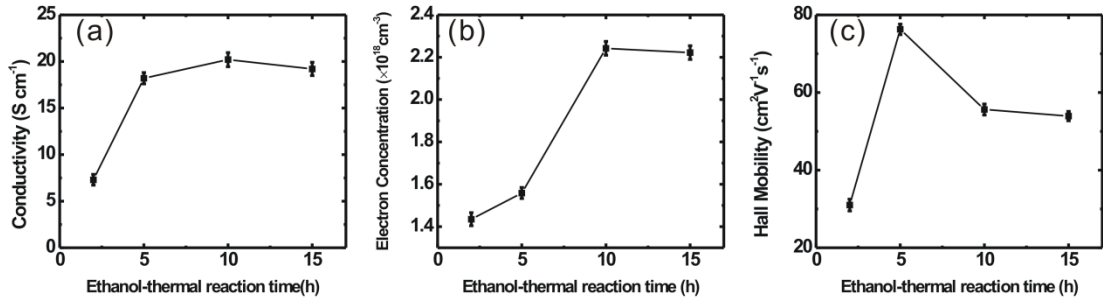

**Figure S2.** (a) Conductivity, (b) electron concentrations and (c) Hall mobilities of S-doped rGO as a function of ethanol-thermal time at 180 °C. The values are mean and standard deviation (SD) for 5 different samples.

Figure S2a shows the conductivity of S-doped rGO as a function of ethanol reaction time  $t_{etr}$ , and the S-rGO-10h has the highest value. This variation can be explained by the effect of  $t_{etr}$  on the electron concentration and mobility of S-doped rGO. From Figure S2b, we find that the electron concentration firstly increases and then decreases with  $t_{etr}$ , and the variation is consistent with the S content shown in Figure 3a. Thus, we can conclude that the electron concentration increases with the S content, indicating that the S doping is n-type doping. Figure S2c shows the Hall mobility as a function of  $t_{etr}$ . Combined with Figure 3a, 3b and S2c, we reveal that firstly, when  $t_{etr}= 2-5$  h, the mobility increases, which is mainly due to the decrease in O content; secondly, when  $t_{etr}= 5-10$  h, the mobility decreases owing to the increase of defects caused by the increase in the S content; thirdly, for  $t_{etr}= 10-15$  h, despite the S content decrease, the mobility still continues to decrease, which is due to an increasing number of defects caused by the breakage of C-S bonds and removal of S atoms.

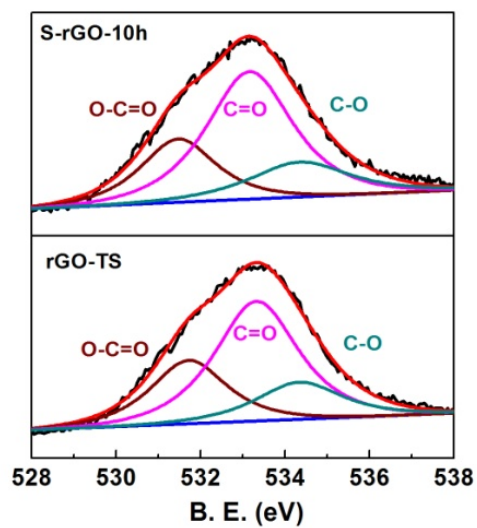

**Figure S3.** High resolution O1s XPS spectra of S-rGO-10 h and rGO-TS. The peaks at around 531.5, 533.2 and 534.4 eV peaks correspond to O–C=O, C=O and C–O groups, respectively.

**TABLE S2.** Contents of O species (O–C=O, C=O, C–O and Total O) in S-rGO-10 h and rGO-TS.

|           | O–C=O (at%) | C=O (at%) | C–O (at%) | Total O (at%) |
|-----------|-------------|-----------|-----------|---------------|
| S-rGO-10h | 2.7         | 5.7       | 1.8       | 10.2          |
| rGO-TS    | 2.7         | 5.8       | 1.9       | 10.4          |

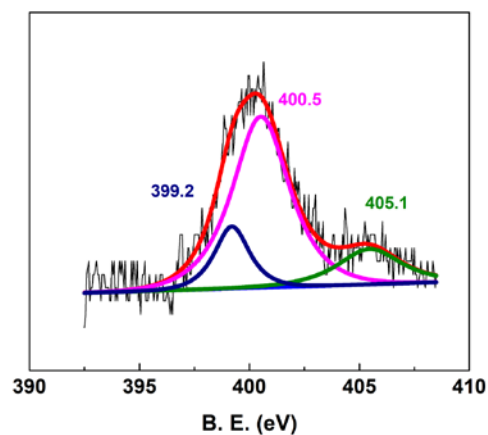

**Figure S4.** High resolution N1s XPS spectra of N-doped rGO synthesized by the hydrazine reduction. The peaks at around 399.2, 400.5, 405.1 eV peaks correspond to the pyridine-N, pyrrolic-N and oxidized N groups, respectively.

### Supplementary References

1. Z. Yang, Z. Yao, G. F. Li, G. Y. Fang, H. G. Nie, Z. Liu, X. M. Zhou, X. A. Chen and S. M. Huang, *ACS Nano*, 2012, **6**, 205-211.
2. S. B. Yang, L. J. Zhi, K. Tang, X. L. Feng, J. Maier and K. Mullen, *Adv. Funct. Mater.*, 2012, **22**, 3634-3640.
3. H. L. Poh, P. Simek, Z. Sofer and M. Pumera, *ACS Nano*, **2013**, **7**, 5262–5272.
